# Supplementary material for: La asignatura del Prácticum
Source: Hindawi journal article supplement (doi:10.1155/2017/9602368), 2010-01-01
Supplement: f1 [file 9602368.f1.pdf]

## Supplementary Material

### High performance liquid chromatography analysis (HPLC)

BF and its 34 subfractions were analyzed by HPLC according to the method described by Munhoz et al. (2012), using a Thermo® Chromatograph with a Finnigan Surveyor LC Pump Plus and autosampler equipped with a 10- $\mu$ L injection loop. Data were acquired and processed by ChromQuest® software. The isolated and identified compounds patuletin (**Tp1**) and patuletin-7-O- $\beta$ -glycoside (patulitrin [**Tp2**]) were used as standards.

### HPLC results

The HPLC fingerprint of CAE revealed two peaks: (1)  $t_r$ ; 16.9 min and (2)  $t_r$ ; 23.7 min (Figure S1A), identified as **Tp2** and **Tp1**, respectively. The fingerprint of the semipurified fraction BF (Figure S1B) showed a major peak with  $t_r$  of 16.9 min, corresponding to compound **Tp2**, and a minor peak identified as **Tp1**.

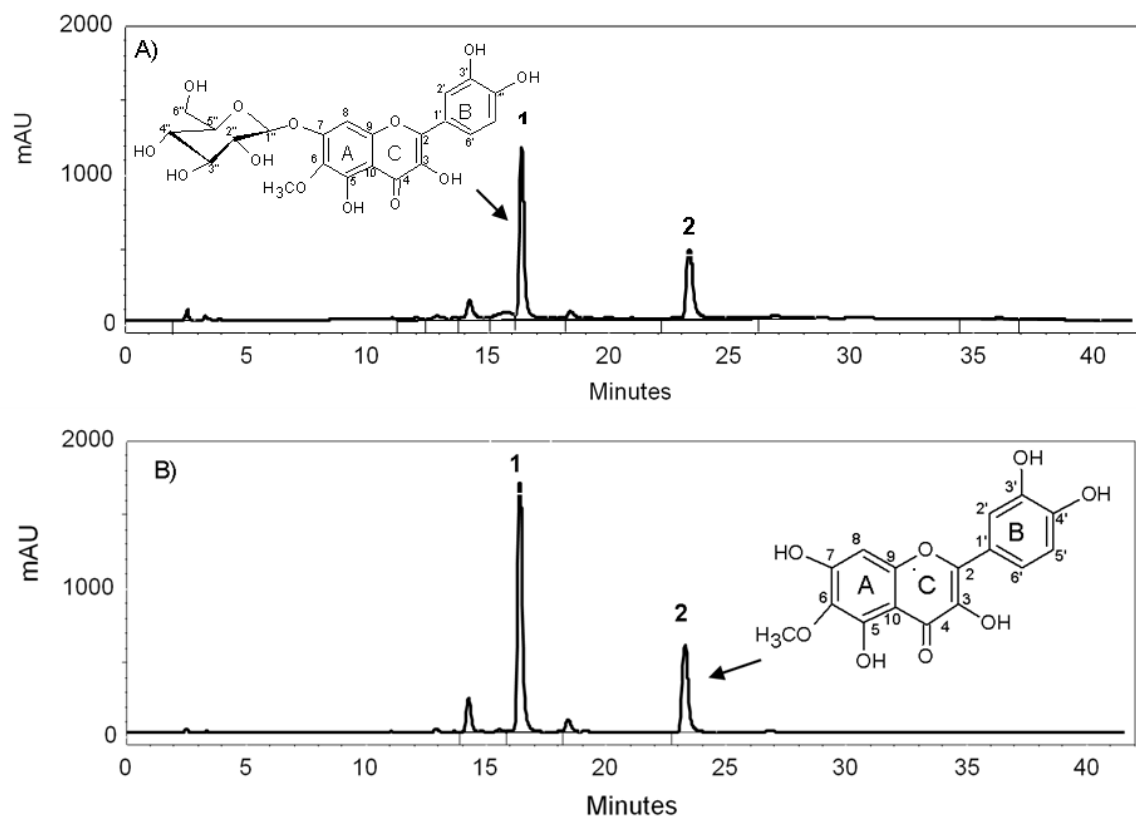

**Figure S1.** HPLC fingerprint of CAE (A) and BF (B) from the inflorescences of *Tagetes patula*. Peaks: 1) **Tp2** (patulitrin) and (2) **Tp1** (patuletin).
